# Supplementary material for: Supramolecular assemblies of triblock copolymers with hexanuclear molybdenum clusters for sensing antibiotics in aqueous solutions via energy transfer
Source: Royal Society of Chemistry journal article supplement (doi:10.1039/c4ra02457e), 2014-01-01
Supplement: c4ra02457e1.pdf [file c4ra02457e1.pdf]

Supplementary Information

Supramolecular assemblies of triblock copolymers with hexanuclear molybdenum clusters for sensing antibiotics in aqueous solutions via energy transfer

Julia Elistratova, Maxim Mikhailov, Vladimir Burilov, Vasily Babaev, Asiya Mustafina, Pavel Abramov, Maxim Sokolov, Ildar Rizvanov, Alexander Konovalov, Vladimir Fedin

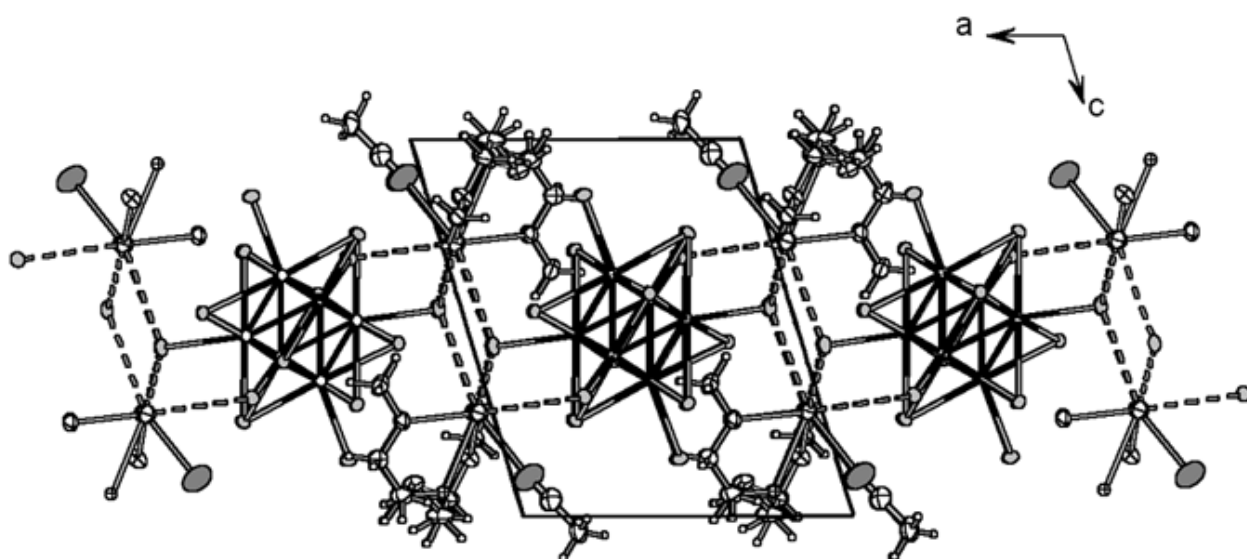

Figure S1. Section of a layer connecting  $\{K(\text{dyglime})(\text{CH}_3\text{CN})\}_2^{2+}$  and  $[\text{Mo}_6\text{I}_{14}]^{2-}$  in the crystal structure of **1**. Contacts between  $\text{K}^+$  and  $\text{I}^-$  are shown as dashed lines.

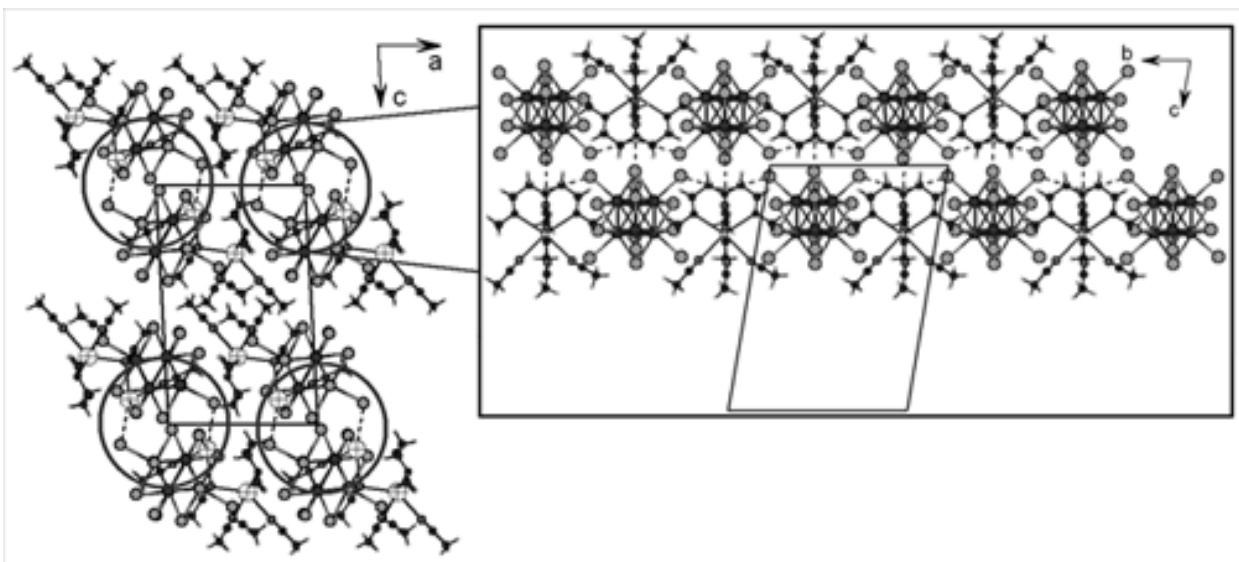

Figure S2. Infinite column built of  $\{(\text{CH}_3\text{CN})_3\text{K}(\text{dyglim}) (\mu\text{-CH}_3\text{CN})\text{K}(\text{CH}_3\text{CN})\}^{2+}$  cations and anions of  $[\text{Mo}_6\text{I}_{14}]^{2-}$  in the crystal structure of **2**.

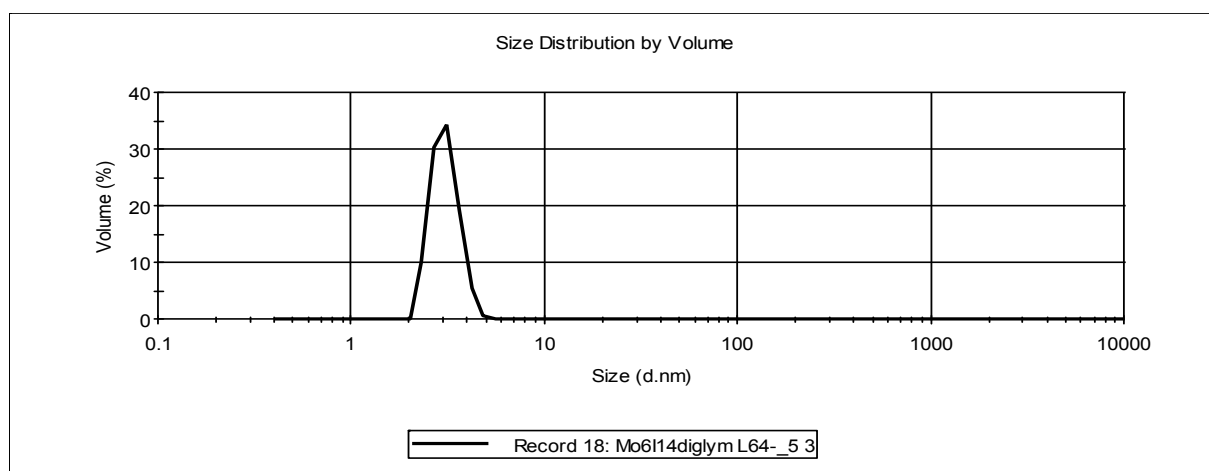

Fig.S3 Size distribution in solutions of L64 (C=0.35-10 mM) and **1** (0.035 mM),  $t=25\text{ }^\circ\text{C}$ , PDI=0.1-0.3.

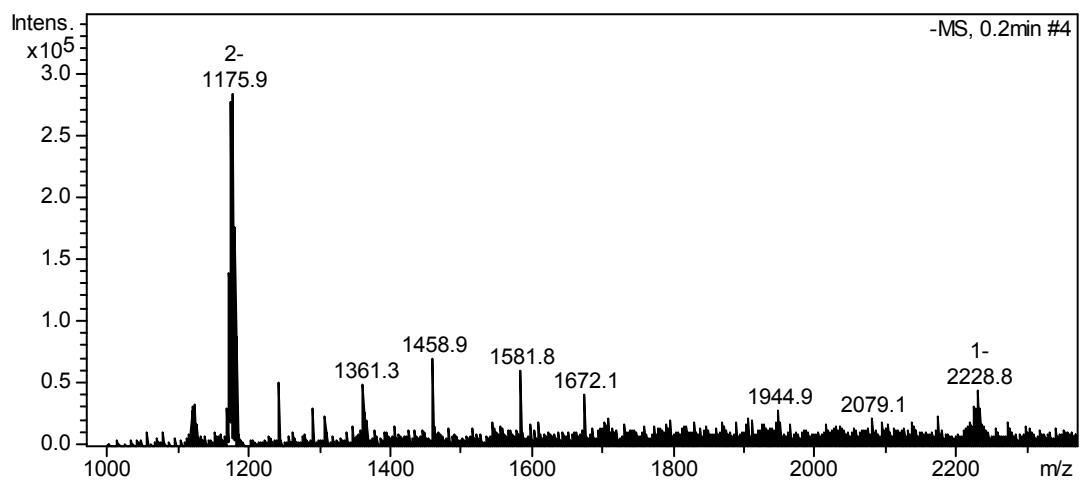

Fig.S4. ESI spectra of **1** (0.01 mM) in aqueous solutions of P123, pH 6.

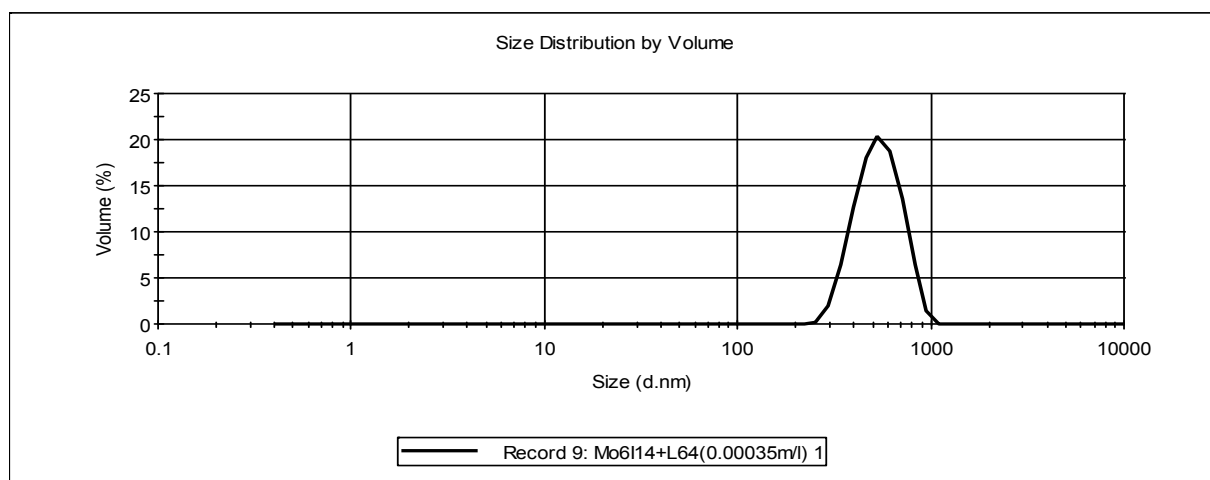

Fig.S5. Size distribution in solutions of L64 (10 mM) and **1** (0.035 mM), 2-3 hours after the sample preparation,  $t=25\text{ }^{\circ}\text{C}$ , PDI=0.1.

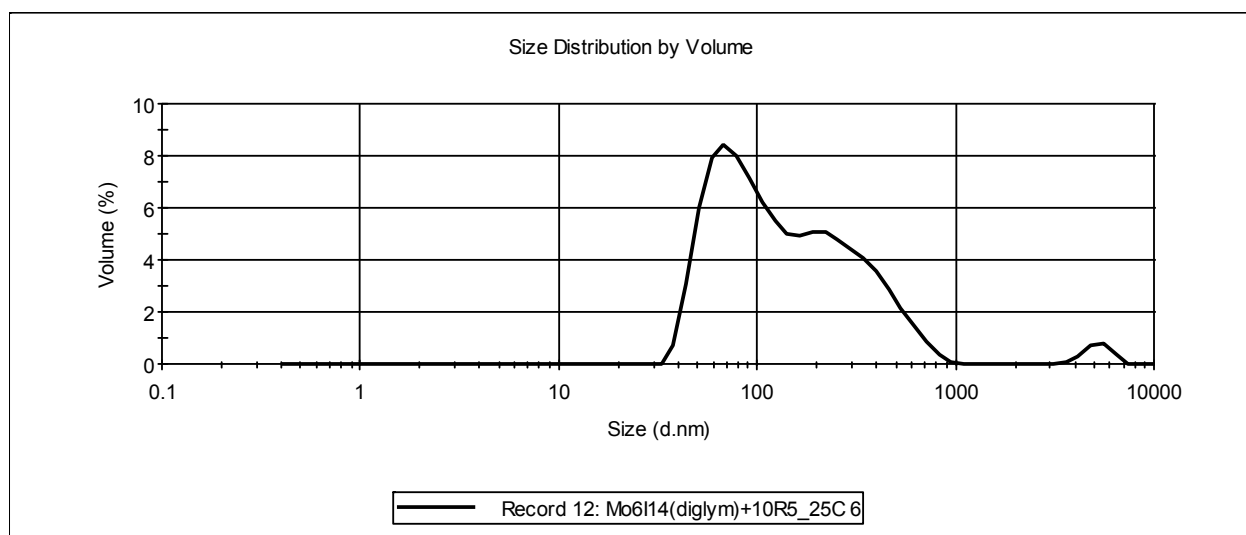

Fig.S6. Size distribution in solutions of **1** (0.035 mM) and 10R5 (10 mM),  $t=25\text{ }^{\circ}\text{C}$ , PDI=0.26.

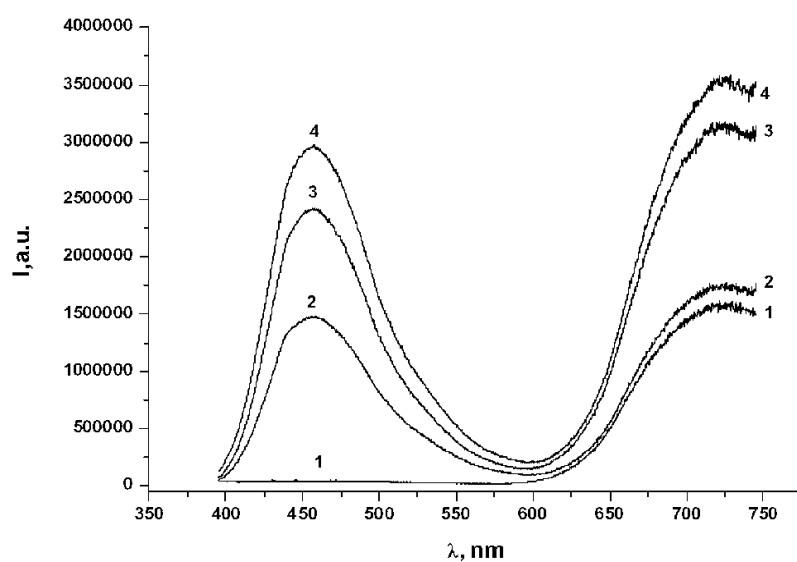

Fig.S7. Luminescence spectra of **1** (0.035 mM) itself (1) and in the presence of difloxacin: 0.02 mM - (2), 0.035 mM - (3), 0.07 mM - (4) in aqueous solutions of L64 (0.35 mM) at pH within 5.0-5.5,  $\lambda_{\text{ex}}=380\text{ nm.}$

Table S1. Experimental details

| Parameters                                                                 | 1                                                                                                            | 2                                                                                                            |
|----------------------------------------------------------------------------|--------------------------------------------------------------------------------------------------------------|--------------------------------------------------------------------------------------------------------------|
| Chemical formula                                                           | C <sub>16</sub> H <sub>34</sub> I <sub>14</sub> K <sub>2</sub> Mo <sub>6</sub> N <sub>2</sub> O <sub>6</sub> | C <sub>16</sub> H <sub>29</sub> I <sub>14</sub> K <sub>2</sub> Mo <sub>6</sub> N <sub>5</sub> O <sub>3</sub> |
| $M_r$                                                                      | 2780.89                                                                                                      | 2769.88                                                                                                      |
| Crystal system, space group                                                | Triclinic, $P\bar{1}$                                                                                        | Triclinic, $P\bar{1}$                                                                                        |
| Temperature (K)                                                            | 150                                                                                                          | 150                                                                                                          |
| $a, b, c$ (Å)                                                              | 10.4798 (3), 11.0059 (3), 13.2185 (3)                                                                        | 11.1975 (4), 13.0620 (4), 18.1803 (8)                                                                        |
| $\alpha, \beta, \gamma$ (°)                                                | 113.459 (1), 99.171 (1), 103.312 (1)                                                                         | 80.332 (1), 86.953 (1), 89.764 (1)                                                                           |
| $V$ (Å <sup>3</sup> )                                                      | 1306.09 (6)                                                                                                  | 2617.58 (17)                                                                                                 |
| $Z$                                                                        | 1                                                                                                            | 2                                                                                                            |
| Radiation type                                                             | Mo $K\alpha$                                                                                                 | Mo $K\alpha$                                                                                                 |
| $\mu$ (mm <sup>-1</sup> )                                                  | 9.86                                                                                                         | 9.84                                                                                                         |
| Crystal size (mm)                                                          | 0.15 × 0.07 × 0.05                                                                                           | 0.20 × 0.20 × 0.10                                                                                           |
| Diffractometer                                                             | Bruker X8Apex                                                                                                | Bruker X8Apex                                                                                                |
| Absorption correction                                                      | Empirical (using intensity measurements) based on intensities ( <i>SADABS</i> , Bruker, 2005)                | Empirical (using intensity measurements) based on intensities ( <i>SADABS</i> , Bruker, 2005)                |
| $T_{\min}, T_{\max}$                                                       | 0.202, 0.338                                                                                                 | 0.055, 0.102                                                                                                 |
| No. of measured, independent and observed [ $I > 2\sigma(I)$ ] reflections | 13307, 6541, 5856                                                                                            | 31131, 14221, 10578                                                                                          |
| $R_{\text{int}}$                                                           | 0.028                                                                                                        | 0.034                                                                                                        |
| $\theta$ values (°)                                                        | $\theta_{\max} = 31.4, \theta_{\min} = 3.1$                                                                  | $\theta_{\max} = 31.6, \theta_{\min} = 2.2$                                                                  |
| Range of $h, k, l$                                                         | $-13 \leq h \leq 15, -15 \leq k \leq 9, -15 \leq l \leq 17$                                                  | $-16 \leq h \leq 16, -16 \leq k \leq 11, -25 \leq l \leq 26$                                                 |
| $R[F^2 > 2\sigma(F^2)], wR(F^2), S$                                        | 0.023, 0.050, 1.04                                                                                           | 0.041, 0.093, 1.04                                                                                           |
| No. of reflections, parameters, restraints                                 | 6541, 215, 0                                                                                                 | 14221, 422, 0                                                                                                |
| H-atom treatment                                                           | H-atom parameters constrained                                                                                | H-atom parameters constrained                                                                                |
| Weighting scheme                                                           | $w = 1/[\sigma^2(F_o^2) + (0.0141P)^2]$ where $P = (F_o^2 + 2F_c^2)/3$                                       | $w = 1/[\sigma^2(F_o^2) + (0.0288P)^2 + 11.015P]$ where $P = (F_o^2 + 2F_c^2)/3$                             |
| $\Delta\rho_{\max}, \Delta\rho_{\min}$ (e Å <sup>-3</sup> )                | 1.08, -0.80                                                                                                  | 1.96, -1.43                                                                                                  |

Computer programs: Apex2 V.1.27 (Bruker, 2005), *SHELXS97* (Sheldrick, 1990), *SHELXL97* (Sheldrick, 1997), *SHELXTL* V6.22 (Bruker, 2000-2005), local programs.

Table S2. Geometry of  $\{\text{Mo}_6(\mu_3\text{-I})_8\}^{4+}$  clusters

| Complex                                                                                                             | Mo-Mo                 | Mo - $\mu_3$ I         | Mo-X <sup>a</sup>                               | Reference |
|---------------------------------------------------------------------------------------------------------------------|-----------------------|------------------------|-------------------------------------------------|-----------|
| <b>1</b>                                                                                                            | 2.6666(4) - 2.6935(4) | 2.7696 (4) - 2.7862(4) | X = I;<br>2.8337(4) - 2.8684(3)                 | This work |
| <b>2</b>                                                                                                            | 2.6758(8) - 2.6822(9) | 2.7663 (8) - 2.7821(7) | X = I;<br>2.8394(8) - 2.8639(8)                 | This work |
| (NBu <sub>4</sub> ) <sub>2</sub> [Mo <sub>6</sub> I <sub>8</sub> (NCS) <sub>6</sub> ]                               | 2.660-2.673           | 2.778-2.789            | X = NCS; 2,141-2,150                            | [1]       |
| (NBu <sub>4</sub> ) <sub>2</sub> [{Mo <sub>6</sub> I <sub>8</sub> }F <sub>6</sub> ]                                 | 2.650                 | 2.798                  | X = F; 2.008                                    | [2]       |
| (NBu <sub>4</sub> ) <sub>2</sub> [{Mo <sub>6</sub> I <sub>8</sub> }Cl <sub>6</sub> ]                                | 2.655                 | 2.775                  | X = Cl; 2.460                                   | -/-       |
| (NBu <sub>4</sub> ) <sub>2</sub> [{Mo <sub>6</sub> I <sub>8</sub> }Br <sub>6</sub> ]                                | 2.670                 | 2.775                  | X = Br; 2.616                                   | -/-       |
| (NBu <sub>4</sub> ) <sub>2</sub> [{Mo <sub>6</sub> I <sub>8</sub> }I <sub>6</sub> ]                                 | 2.675                 | 2.767                  | X = I; 2.846                                    | -/-       |
| (NBu <sub>4</sub> ) <sub>2</sub> [Mo <sub>6</sub> I <sub>8</sub> (C <sub>3</sub> F <sub>7</sub> COO) <sub>6</sub> ] | 2.6604(4)             | 2.7740(4)              | X = C <sub>3</sub> F <sub>7</sub> COO; 2.132(2) | [3]       |

#### References

- [1] M. Höhling, M. K. Simsek, W. Preetz // *Z. anorg. allg. Chem.* 624 (1998) 1171-1174  
 [2] P. Brückner, W. Preetz, M. Pünjer // *Z. anorg. allg. Chem.* 623 (1997) 8-17  
 [3] M.N. Sokolov, M. A. Mihailov, E.V. Peresypkina, K.A. Brylev, N. Kitamura, V.P. Fedin // *Dalton Trans.*, 2011, 40, 6375
